# Supplementary material for: A Comparison of Machine Learning Algorithms and Feature Sets for Automatic Vocal Emotion Recognition in Speech
Source: MDPI journal article supplement (doi:10.3390/s22197561), 2022-10-06

## Figure S2. Confusion Matrices

Note. The matrices are placed in the following order:

**Page 2:** emobase/DT, emobase/KNN, emobase/LOG, emobase/MLP, emobase/MLR, emobase/RF

**Page 3:** emobase/SMO, IS-09/DT, IS-09/KNN, IS-09/LOG, IS-09/MLP, IS-09/MLR

**Page 4:** IS-09/RF, IS-09/SMO, GeMAPS/DT, GeMAPS/RF, GeMAPS/MLR, GeMAPS/MLP

**Page 5:** GeMAPS/LOG, GeMAPS/KNN, GeMAPS/SMO, eGeMAPS/MLP, eGeMAPS/RF, eGeMAPS/MLR

**Page 6:** eGeMAPS/LOG, eGeMAPS/KNN, eGeMAPS/DT, eGeMAPS/SMO

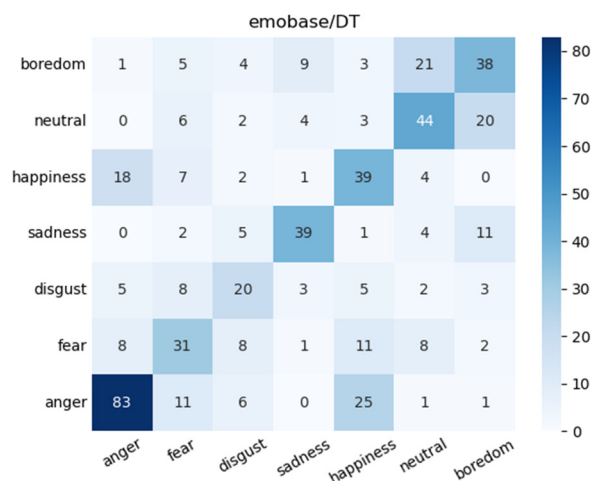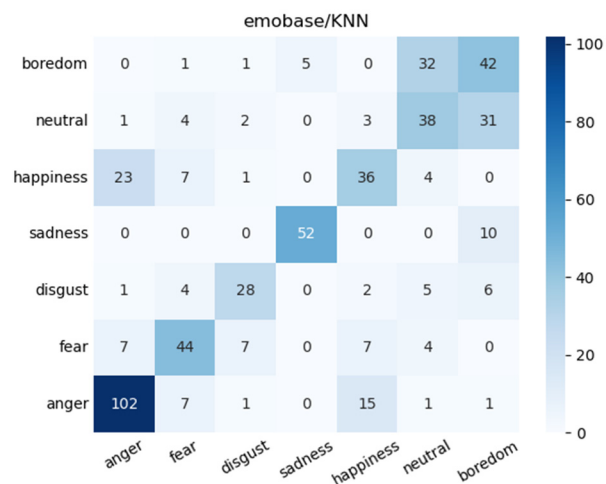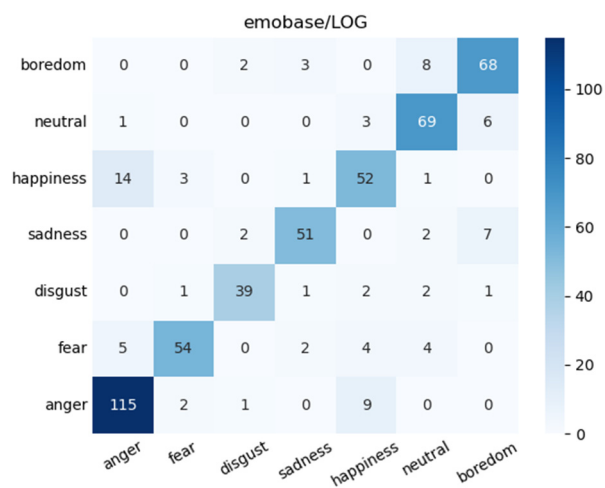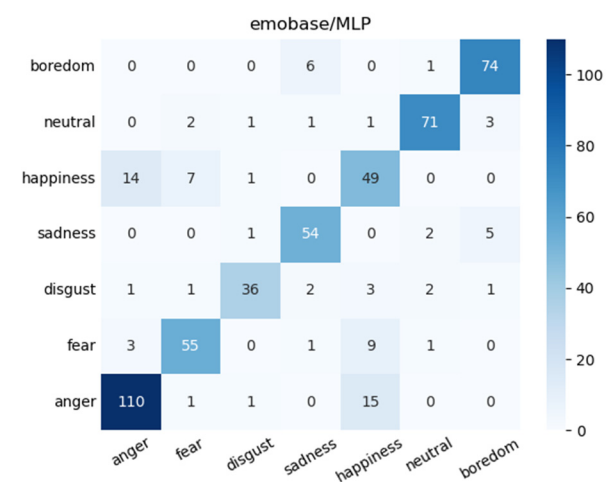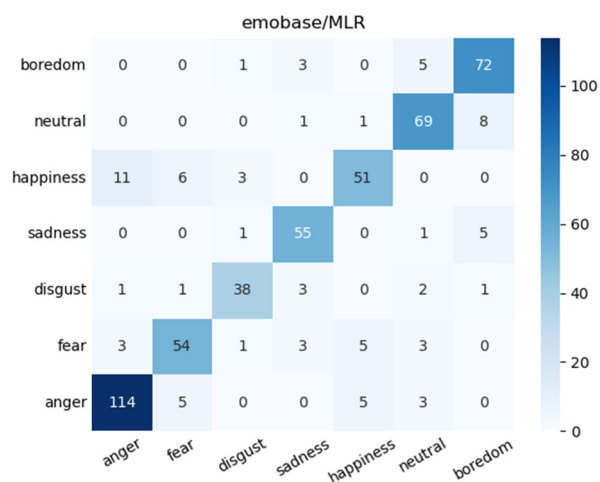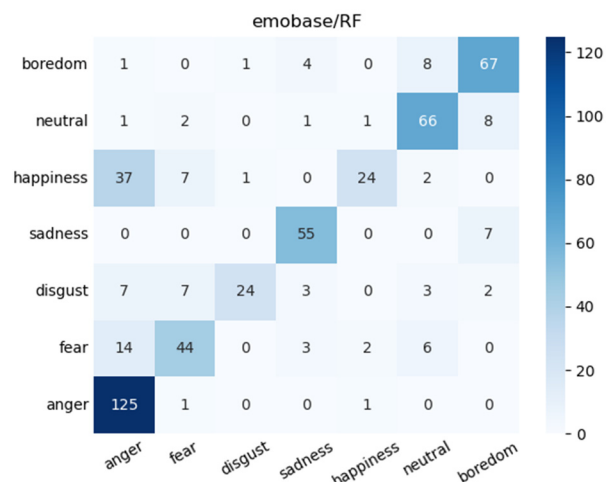

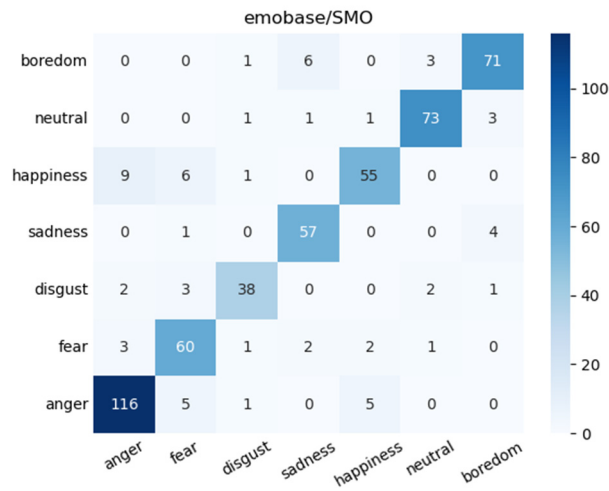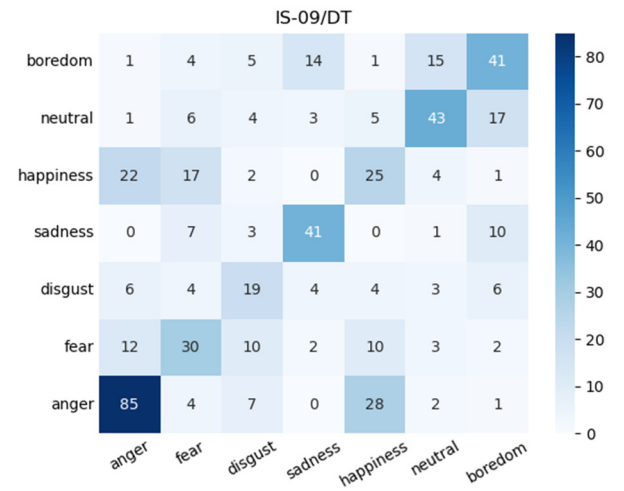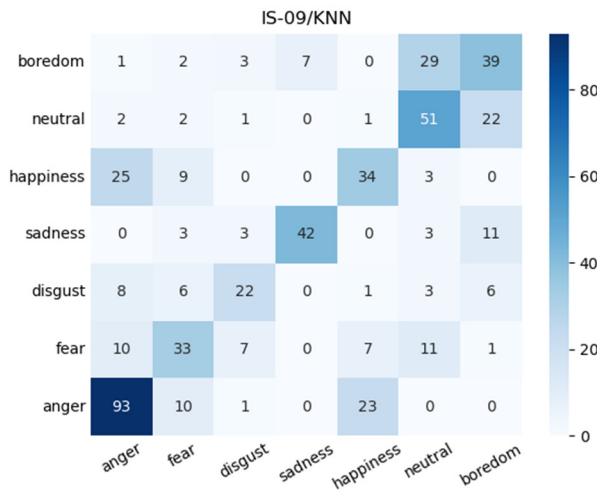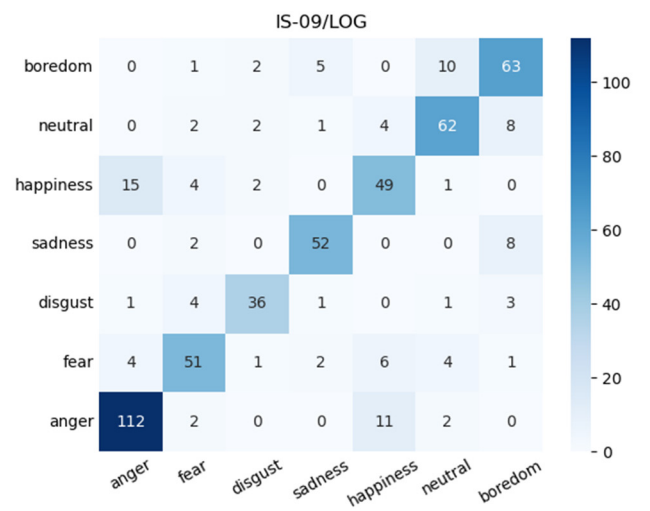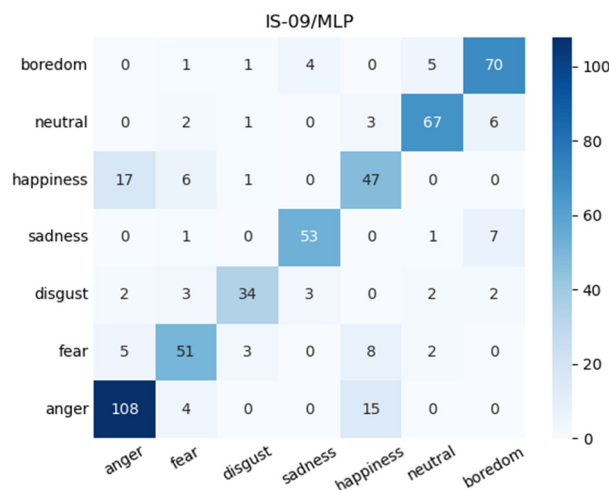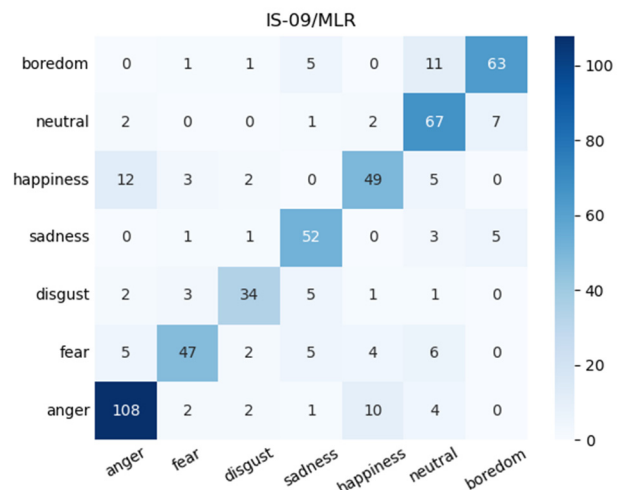

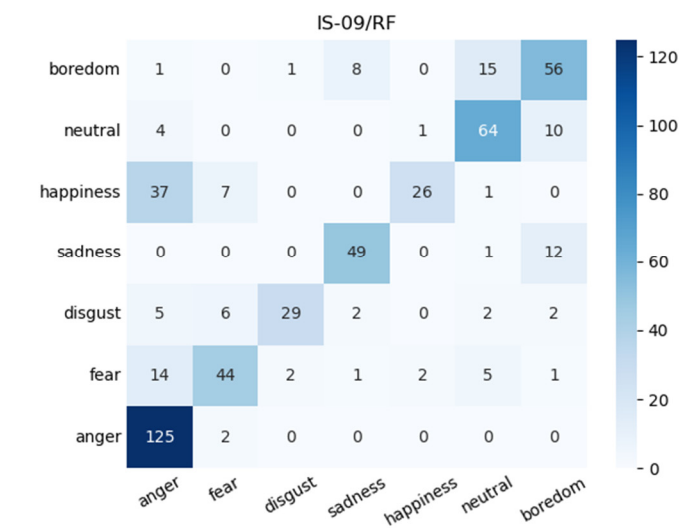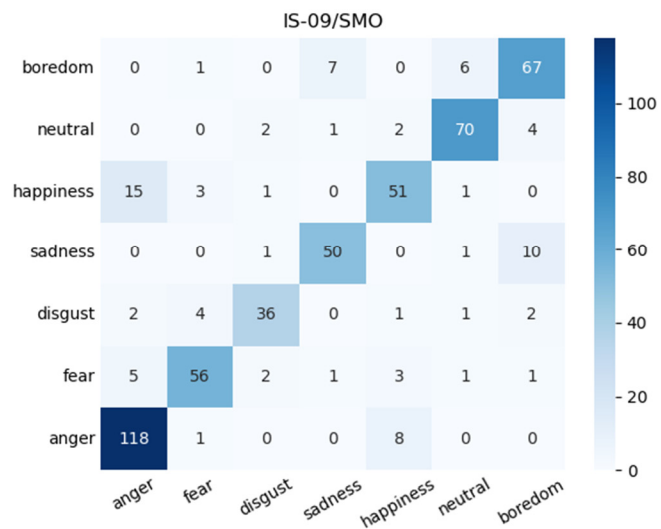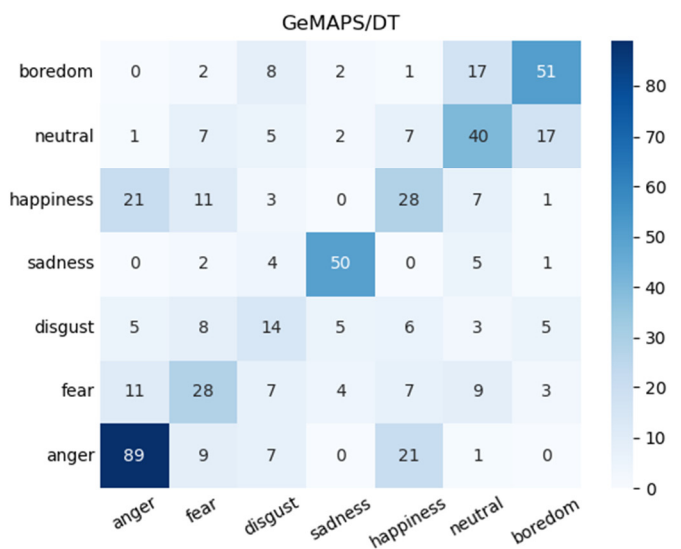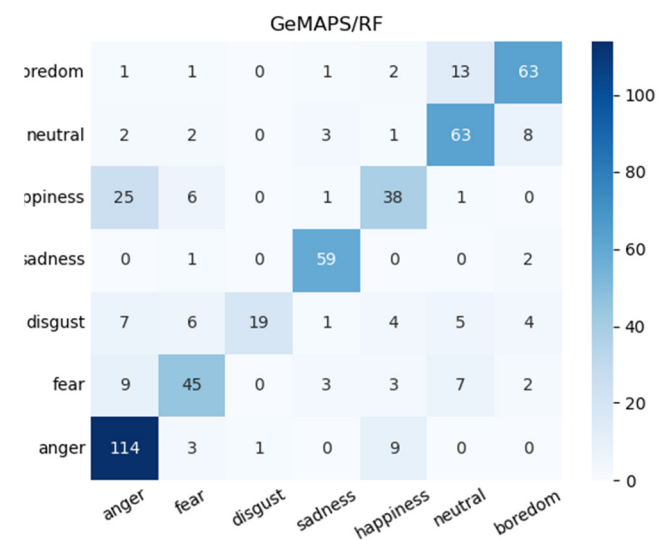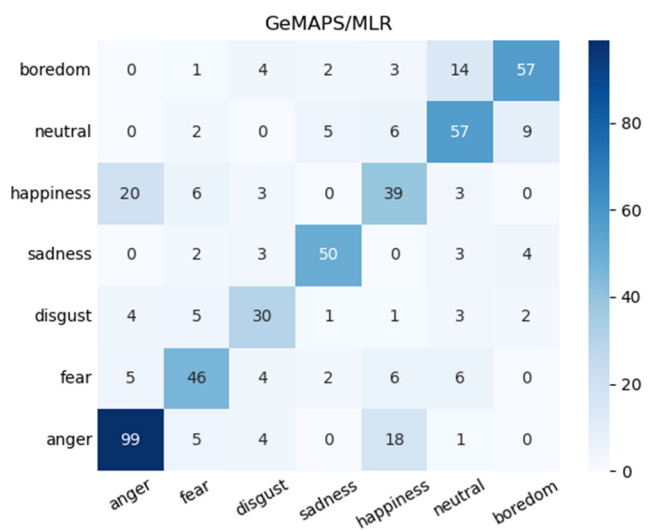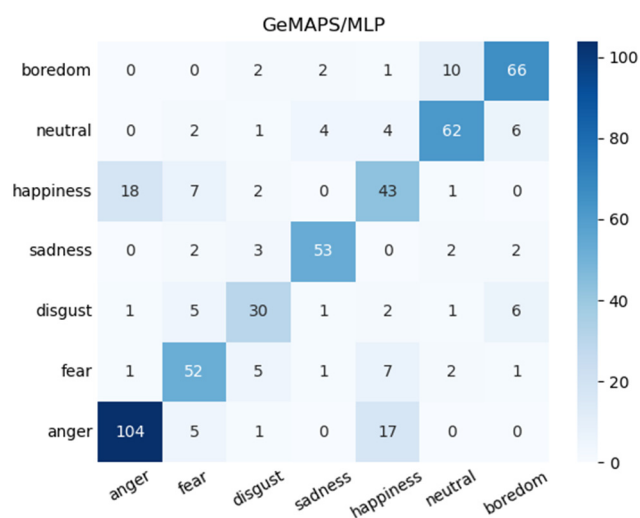

GeMAPS/LOG

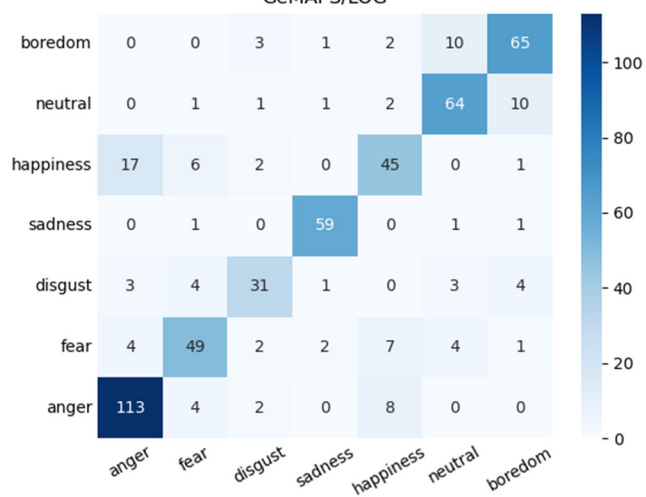

GeMAPS/KNN

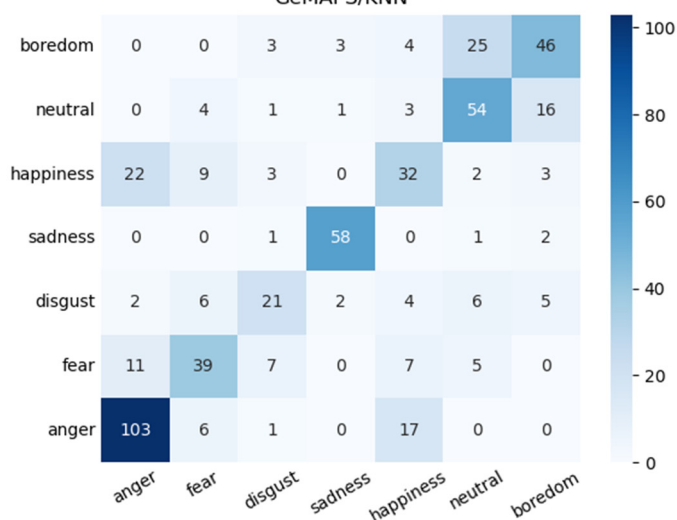

GeMAPS/SMO

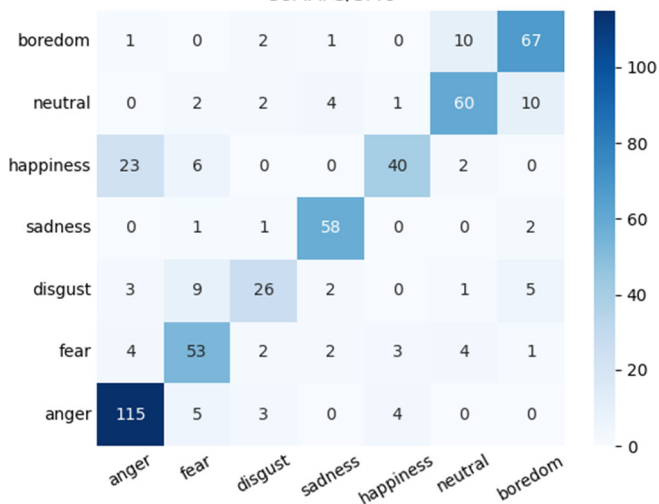

eGeMAPS/MLP

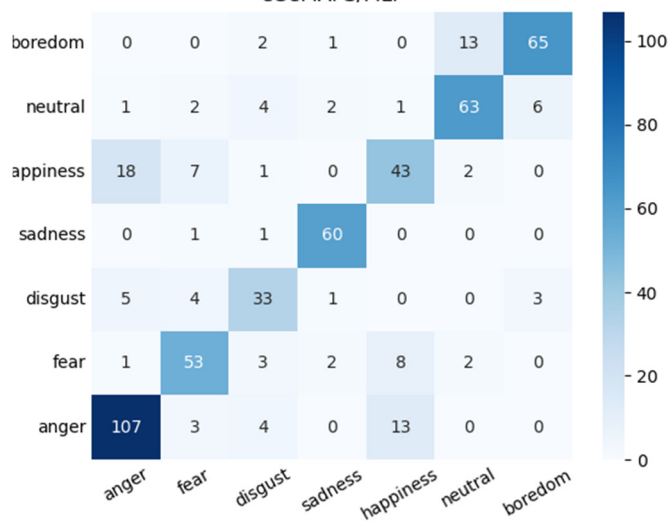

eGeMAPS/RF

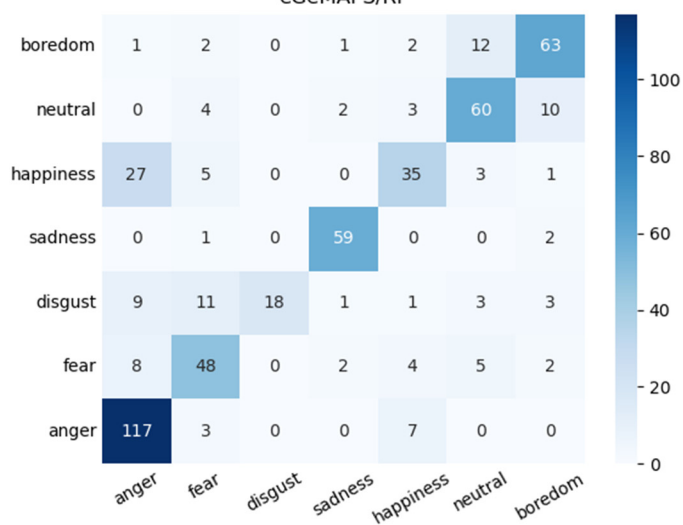

eGeMAPS/MLR

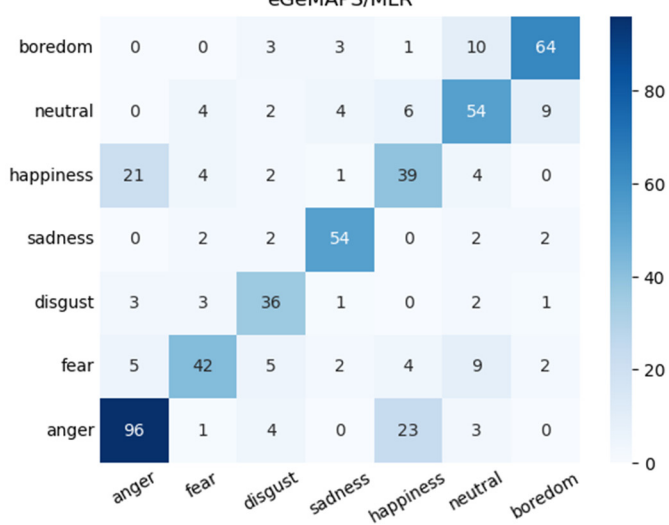

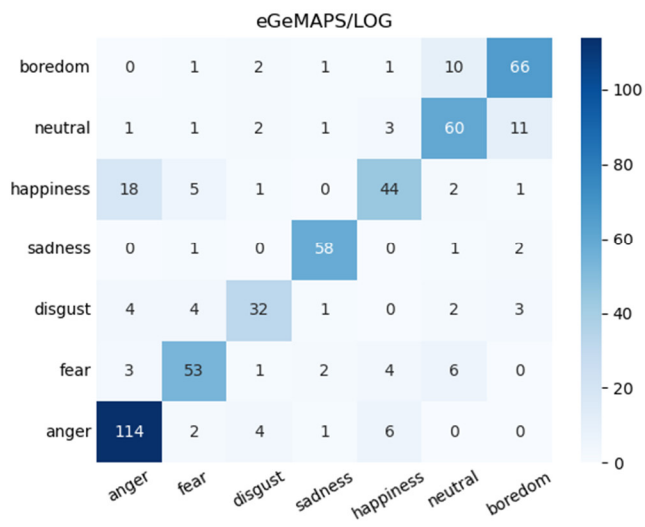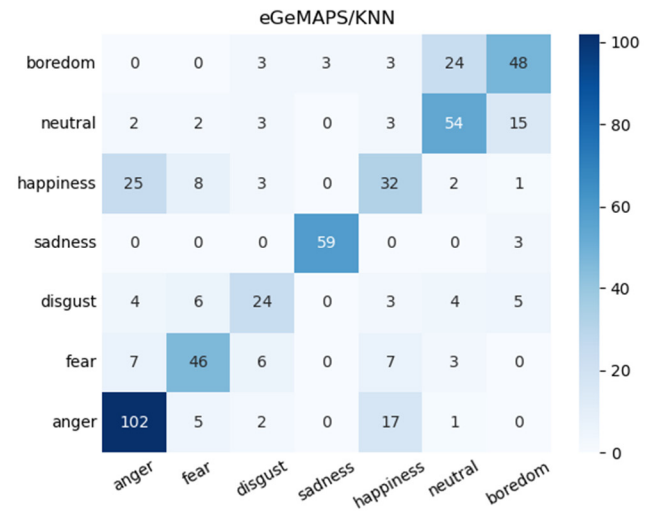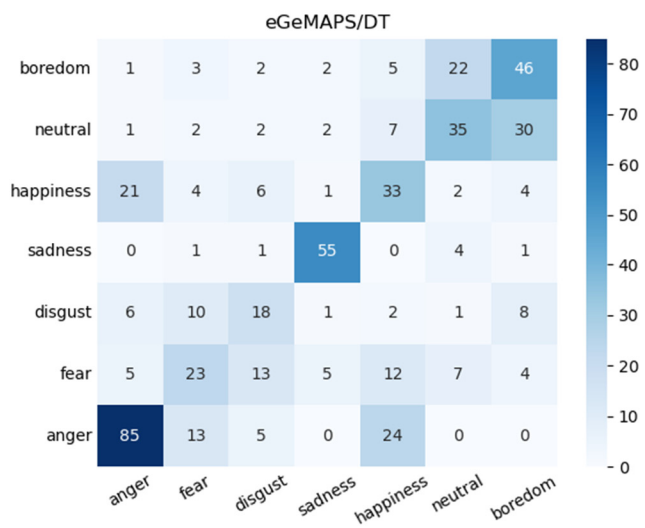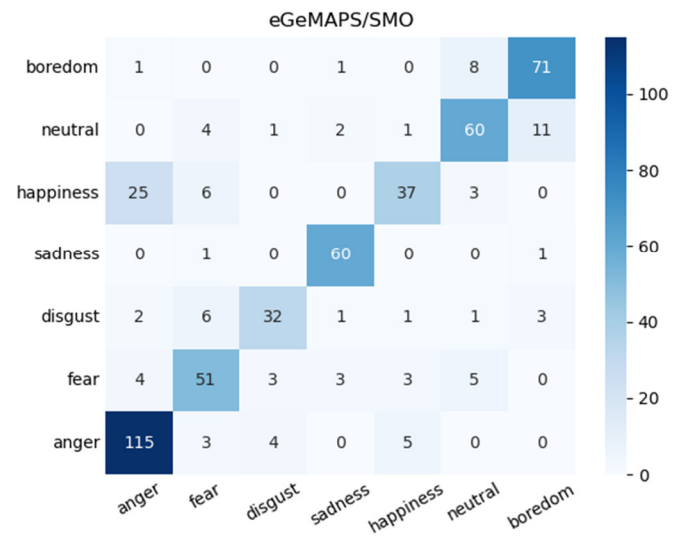

Supplement: s1 [file s1]
